# Supplementary material for: A multi-omics data simulator for complex disease studies and its application to evaluate multi-omics data analysis methods for disease classification
Source: PubMed Central journal article supplement (PMC6486474; doi:10.1093/gigascience/giz045), 2019-04-26

# GigaScience

## A multi-omics data simulator for complex disease studies and its application to evaluate multi-omics data analysis methods for disease classification

--Manuscript Draft--

|                                                      |                                                                                                                                                                                                                                                                                                                                                                                                                                                                                                                                                                                                                                                                                                                                                                                                                                                                                                                                                                                                                                                                                                                                                                                                                                                                                                                                                                                                                                                                                                                                                                                                                                                                                                                                                                                                                                                                                                                                                                                                                                                                          |                   |
|------------------------------------------------------|--------------------------------------------------------------------------------------------------------------------------------------------------------------------------------------------------------------------------------------------------------------------------------------------------------------------------------------------------------------------------------------------------------------------------------------------------------------------------------------------------------------------------------------------------------------------------------------------------------------------------------------------------------------------------------------------------------------------------------------------------------------------------------------------------------------------------------------------------------------------------------------------------------------------------------------------------------------------------------------------------------------------------------------------------------------------------------------------------------------------------------------------------------------------------------------------------------------------------------------------------------------------------------------------------------------------------------------------------------------------------------------------------------------------------------------------------------------------------------------------------------------------------------------------------------------------------------------------------------------------------------------------------------------------------------------------------------------------------------------------------------------------------------------------------------------------------------------------------------------------------------------------------------------------------------------------------------------------------------------------------------------------------------------------------------------------------|-------------------|
| <b>Manuscript Number:</b>                            | GIGA-D-18-00397                                                                                                                                                                                                                                                                                                                                                                                                                                                                                                                                                                                                                                                                                                                                                                                                                                                                                                                                                                                                                                                                                                                                                                                                                                                                                                                                                                                                                                                                                                                                                                                                                                                                                                                                                                                                                                                                                                                                                                                                                                                          |                   |
| <b>Full Title:</b>                                   | A multi-omics data simulator for complex disease studies and its application to evaluate multi-omics data analysis methods for disease classification                                                                                                                                                                                                                                                                                                                                                                                                                                                                                                                                                                                                                                                                                                                                                                                                                                                                                                                                                                                                                                                                                                                                                                                                                                                                                                                                                                                                                                                                                                                                                                                                                                                                                                                                                                                                                                                                                                                    |                   |
| <b>Article Type:</b>                                 | Research                                                                                                                                                                                                                                                                                                                                                                                                                                                                                                                                                                                                                                                                                                                                                                                                                                                                                                                                                                                                                                                                                                                                                                                                                                                                                                                                                                                                                                                                                                                                                                                                                                                                                                                                                                                                                                                                                                                                                                                                                                                                 |                   |
| <b>Funding Information:</b>                          | Ministry of Science and Technology,<br>Taiwan<br>(MOST 106-2221-E-400-005-MY3)                                                                                                                                                                                                                                                                                                                                                                                                                                                                                                                                                                                                                                                                                                                                                                                                                                                                                                                                                                                                                                                                                                                                                                                                                                                                                                                                                                                                                                                                                                                                                                                                                                                                                                                                                                                                                                                                                                                                                                                           | Dr. Ren-Hua Chung |
| <b>Abstract:</b>                                     | <p><b>Background</b></p> <p>An integrative multi-omics analysis approach that combines multiple types of omics data including genomics, epigenomics, transcriptomics, proteomics, metabolomics, and microbiomics, has become increasingly popular for understanding the pathophysiology of complex diseases. Although many multi-omics analysis methods have been developed for complex disease studies, there is no simulation tool that simulates multiple types of omics data and models their relationships with disease status. Without such a tool, it is difficult to evaluate the multi-omics analysis methods on the same scale and to estimate the sample size or power when planning a new multi-omics disease study.</p> <p><b>Results</b></p> <p>We developed a multi-omics data simulator OmicsSIMLA, which simulates genomics (i.e., SNPs and copy number variations), epigenomics (i.e., whole-genome bisulphite sequencing), transcriptomics (i.e., RNA-seq), and proteomics (i.e., normalized reverse phase protein array) data at the whole-genome level. Furthermore, the relationships between different types of omics data, such as meQTLs (SNPs influencing methylation), eQTLs (SNPs influencing gene expression), and eQTM (methylation influencing gene expression), were modeled. More importantly, the relationships between these multi-omics data and the disease status were modeled as well. We used OmicsSIMLA to simulate a multi-omics dataset for breast cancer under a hypothetical disease model, and used the data to compare the performance among existing multi-omics analysis methods in terms of disease classification accuracy and run time.</p> <p><b>Conclusions</b></p> <p>Our results demonstrated that complex disease mechanisms can be simulated by OmicsSIMLA, and a random forest-based method showed the highest prediction accuracy when the multi-omics data were properly normalized. OmicsSIMLA can be downloaded at <a href="https://omicssimla.sourceforge.io">https://omicssimla.sourceforge.io</a>.</p> |                   |
| <b>Corresponding Author:</b>                         | Ren-Hua Chung<br>National Health Research Institutes<br>Zhunan, Miaoli TAIWAN                                                                                                                                                                                                                                                                                                                                                                                                                                                                                                                                                                                                                                                                                                                                                                                                                                                                                                                                                                                                                                                                                                                                                                                                                                                                                                                                                                                                                                                                                                                                                                                                                                                                                                                                                                                                                                                                                                                                                                                            |                   |
| <b>Corresponding Author Secondary Information:</b>   |                                                                                                                                                                                                                                                                                                                                                                                                                                                                                                                                                                                                                                                                                                                                                                                                                                                                                                                                                                                                                                                                                                                                                                                                                                                                                                                                                                                                                                                                                                                                                                                                                                                                                                                                                                                                                                                                                                                                                                                                                                                                          |                   |
| <b>Corresponding Author's Institution:</b>           | National Health Research Institutes                                                                                                                                                                                                                                                                                                                                                                                                                                                                                                                                                                                                                                                                                                                                                                                                                                                                                                                                                                                                                                                                                                                                                                                                                                                                                                                                                                                                                                                                                                                                                                                                                                                                                                                                                                                                                                                                                                                                                                                                                                      |                   |
| <b>Corresponding Author's Secondary Institution:</b> |                                                                                                                                                                                                                                                                                                                                                                                                                                                                                                                                                                                                                                                                                                                                                                                                                                                                                                                                                                                                                                                                                                                                                                                                                                                                                                                                                                                                                                                                                                                                                                                                                                                                                                                                                                                                                                                                                                                                                                                                                                                                          |                   |
| <b>First Author:</b>                                 | Ren-Hua Chung                                                                                                                                                                                                                                                                                                                                                                                                                                                                                                                                                                                                                                                                                                                                                                                                                                                                                                                                                                                                                                                                                                                                                                                                                                                                                                                                                                                                                                                                                                                                                                                                                                                                                                                                                                                                                                                                                                                                                                                                                                                            |                   |
| <b>First Author Secondary Information:</b>           |                                                                                                                                                                                                                                                                                                                                                                                                                                                                                                                                                                                                                                                                                                                                                                                                                                                                                                                                                                                                                                                                                                                                                                                                                                                                                                                                                                                                                                                                                                                                                                                                                                                                                                                                                                                                                                                                                                                                                                                                                                                                          |                   |
| <b>Order of Authors:</b>                             | Ren-Hua Chung                                                                                                                                                                                                                                                                                                                                                                                                                                                                                                                                                                                                                                                                                                                                                                                                                                                                                                                                                                                                                                                                                                                                                                                                                                                                                                                                                                                                                                                                                                                                                                                                                                                                                                                                                                                                                                                                                                                                                                                                                                                            |                   |

|                                                                                                                                                                                                                                                                                                                                                                                                                                                                                                                                     |                 |
|-------------------------------------------------------------------------------------------------------------------------------------------------------------------------------------------------------------------------------------------------------------------------------------------------------------------------------------------------------------------------------------------------------------------------------------------------------------------------------------------------------------------------------------|-----------------|
|                                                                                                                                                                                                                                                                                                                                                                                                                                                                                                                                     | Chen-Yu Kang    |
| <b>Order of Authors Secondary Information:</b>                                                                                                                                                                                                                                                                                                                                                                                                                                                                                      |                 |
| <b>Additional Information:</b>                                                                                                                                                                                                                                                                                                                                                                                                                                                                                                      |                 |
| <b>Question</b>                                                                                                                                                                                                                                                                                                                                                                                                                                                                                                                     | <b>Response</b> |
| Are you submitting this manuscript to a special series or article collection?                                                                                                                                                                                                                                                                                                                                                                                                                                                       | No              |
| <p><b>Experimental design and statistics</b></p> <p>Full details of the experimental design and statistical methods used should be given in the Methods section, as detailed in our <a href="#">Minimum Standards Reporting Checklist</a>. Information essential to interpreting the data presented should be made available in the figure legends.</p> <p>Have you included all the information requested in your manuscript?</p>                                                                                                  | Yes             |
| <p><b>Resources</b></p> <p>A description of all resources used, including antibodies, cell lines, animals and software tools, with enough information to allow them to be uniquely identified, should be included in the Methods section. Authors are strongly encouraged to cite <a href="#">Research Resource Identifiers</a> (RRIDs) for antibodies, model organisms and tools, where possible.</p> <p>Have you included the information requested as detailed in our <a href="#">Minimum Standards Reporting Checklist</a>?</p> | Yes             |
| <p><b>Availability of data and materials</b></p> <p>All datasets and code on which the conclusions of the paper rely must be either included in your submission or deposited in <a href="#">publicly available repositories</a> (where available and ethically appropriate), referencing such data using a unique identifier in the references and in</p>                                                                                                                                                                           | Yes             |

the “Availability of Data and Materials” section of your manuscript.

Have you have met the above requirement as detailed in our [Minimum Standards Reporting Checklist?](#)

1 **A multi-omics data simulator for complex disease studies and its**  
2  
3  
4 **application to evaluate multi-omics data analysis methods for disease**  
5  
6  
7 **classification**  
8  
9

10 Ren-Hua Chung<sup>1\*</sup>, Chen-Yu Kang<sup>1</sup>  
11

12  
13 <sup>1</sup>Division of Biostatistics and Bioinformatics, Institute of Population Health Sciences,  
14  
15

16 National Health Research Institutes, Zhunan, Taiwan  
17  
18  
19  
20  
21  
22

23 \*Corresponding author: Ren-Hua Chung, PhD  
24  
25

26 Address: No 35, Keyan Road, Zhunan, Miaoli, 350, Taiwan  
27  
28

29 Tel: 886-37-246-166 #36105  
30  
31

32 Fax: 886-37-586-467  
33  
34  
35

36 Email: rchung@nhri.org.tw  
37  
38  
39  
40  
41  
42  
43  
44  
45  
46  
47  
48  
49  
50  
51  
52  
53  
54  
55  
56  
57  
58  
59  
60  
61  
62  
63  
64  
65

## Abstract

### Background

An integrative multi-omics analysis approach that combines multiple types of omics data including genomics, epigenomics, transcriptomics, proteomics, metabolomics, and microbiomics, has become increasingly popular for understanding the pathophysiology of complex diseases. Although many multi-omics analysis methods have been developed for complex disease studies, there is no simulation tool that simulates multiple types of omics data and models their relationships with disease status. Without such a tool, it is difficult to evaluate the multi-omics analysis methods on the same scale and to estimate the sample size or power when planning a new multi-omics disease study.

### Results

We developed a multi-omics data simulator OmicsSIMLA, which simulates genomics (i.e., SNPs and copy number variations), epigenomics (i.e., whole-genome bisulphite sequencing), transcriptomics (i.e., RNA-seq), and proteomics (i.e., normalized reverse phase protein array) data at the whole-genome level. Furthermore, the relationships between different types of omics data, such as meQTLs (SNPs influencing methylation), eQTLs (SNPs influencing gene expression), and eQTM (methylation influencing gene expression), were modeled. More importantly, the relationships between these multi-omics data and the disease status were modeled as well. We used OmicsSIMLA to simulate a multi-omics dataset for breast cancer

1 under a hypothetical disease model, and used the data to compare the performance among  
2  
3  
4 existing multi-omics analysis methods in terms of disease classification accuracy and run  
5  
6  
7 time.  
8  
9

## 10 **Conclusions**

11  
12 Our results demonstrated that complex disease mechanisms can be simulated by  
13  
14 OmicsSIMLA, and a random forest-based method showed the highest prediction accuracy  
15  
16  
17 when the multi-omics data were properly normalized. OmicsSIMLA can be downloaded at  
18  
19  
20 <https://omicssimla.sourceforge.io>.  
21  
22  
23  
24  
25  
26  
27  
28

## 29 **Keywords**

30  
31  
32 Multi-omics data, complex disease study, simulation tool  
33  
34  
35  
36  
37  
38

## 39 **Introduction**

40  
41  
42 Complex diseases such as hypertension, type 2 diabetes, and autism are caused by multiple  
43  
44 genetic and environmental factors [1]. Genome-wide association studies have identified many  
45  
46 genetic variants (i.e., SNPs) associated with the complex diseases. However, it remains  
47  
48  
49 difficult to understand the roles of the associated SNPs in the molecular pathophysiology of  
50  
51  
52 the disease and how the SNPs interact with other SNPs in a biological network [2]. With the  
53  
54  
55 advancement of high-throughput sequencing technology such as next-generation sequencing  
56  
57  
58  
59  
60  
61  
62  
63  
64  
65

1 (NGS) and massive parallel technology such as mass spectrometry, multiple types of omics  
2  
3  
4 data (i.e., multi-omics data) including genomics, epigenomics, transcriptomics, proteomics,  
5  
6  
7 metabolomics, and microbiomics are rapidly generated [3]. As a single type of data generally  
8  
9  
10 cannot capture the complexity of molecular events causing the disease, an integrative  
11  
12  
13 approach to combining the multi-omics data would be ideal to help elucidate the  
14  
15  
16 pathophysiology of the disease [2].  
17  
18  
19  
20  
21  
22

23 Integrative methods to combine multi-omics data for disease studies have been developed  
24  
25  
26 rapidly [4-8]. They can be generally classified into two categories: multi-staged and meta-  
27  
28  
29 dimensional approaches [9]. The multi-staged approach aims to first identify relationships  
30  
31  
32 between the multi-omics data, and then test the associations between the multi-omics data  
33  
34  
35 and the phenotype. For example, Jennings et al. [7] constructed a Bayesian hierarchical  
36  
37  
38 model consisting of two stages. The first stage partitioned gene expression into factors  
39  
40  
41 accounted by methylation, copy number variation (CNV), and other unknown causes. These  
42  
43  
44 factors were subsequently used as predictors for clinical outcomes in the second stage model.  
45  
46  
47 One advantage of this approach is that the causal relationships between multi-omics data can  
48  
49  
50 be modeled. In contrast, the meta-dimensional approach combines the multi-omics data  
51  
52  
53 simultaneously. Raw or the transformed data from the multi-omics data are combined into a  
54  
55  
56 single matrix for the analysis. This approach allows for a more flexible inference of the  
57  
58  
59  
60  
61  
62  
63  
64  
65

1 relationships among the multi-omics data, without the assumptions of the causal relationships  
2  
3  
4 between these data.  
5  
6  
7  
8  
9

10 Although many multi-omics analysis methods for disease studies are available, they were  
11  
12 generally evaluated by simulations with data generated specifically to the methods. To  
13  
14 compare the performance among these methods, it is necessary to use the same simulated  
15  
16 multi-omics dataset with disease status. However, current simulation tools for disease studies  
17  
18 mainly focused on simulating a certain type of omics data. For example, more than 25  
19  
20 simulators are available for simulating genetic data with phenotypic trait, according to the  
21  
22 Genetic Simulation Resources website (<https://popmodels.cancercontrol.cancer.gov/gsr/>).  
23  
24  
25 Tools such as WGBSSuite [10] and pWGBSSimla [11] can simulate whole-genome  
26  
27 bisulphite sequencing (WGBS) data in case-control samples. Moreover, tools such as  
28  
29 Polyester [12] and SimSeq [13] simulate RNA-seq data with differential gene expression  
30  
31 between two groups of samples. To our knowledge, there is currently no simulation tool that  
32  
33 is capable of simulating a variety of omics data types and modeling the complex relationships  
34  
35 between the data and the disease. Furthermore, sample size estimation when planning a  
36  
37 multi-omics study to ensure sufficient power also becomes important [3]. This also requires a  
38  
39 simulation tool that simulates realistic multi-omics data structures and models the  
40  
41 architecture of the complex disease.  
42  
43  
44  
45  
46  
47  
48  
49  
50  
51  
52  
53  
54  
55  
56  
57  
58  
59  
60  
61  
62  
63  
64  
65



1  
2  
3  
4 Here, we developed the multi-omics data simulator OmicsSIMLA, which simulates genomics  
5  
6  
7 data including SNPs and CNVs, epigenomics data such as the WGBS data, transcriptomics  
8  
9  
10 data (i.e., RNA-seq), and proteomics data such as the normalized reverse phase protein array  
11  
12  
13 (RPPA) data at a whole-genome level. Furthermore, the relationships between different types  
14  
15  
16 of omics data, such as meQTLs (SNPs influencing methylation), eQTLs (SNPs influencing  
17  
18  
19 gene expression), and eQTM (methylation influencing gene expression), were modeled. More  
20  
21  
22 importantly, the relationships between these multi-omics data and disease status were  
23  
24  
25 modeled as well. The disease models in OmicsSIMLA are flexible so that the main effects  
26  
27  
28 and/or interaction effects (either risk or protective) of SNPs and CNVs on the disease can be  
29  
30  
31 specified. Differential methylation and differential gene and protein expression between cases  
32  
33  
34 and controls can also be simulated. We demonstrated the usefulness of OmicsSIMLA by  
35  
36  
37 simulating a multi-omics dataset for breast cancer under a hypothetical disease model, and  
38  
39  
40 compared the performance among existing multi-omics analysis tools based on the data.  
41  
42  
43  
44  
45  
46  
47

## 48 **Results**

49  
50  
51 Figure 1 shows the framework of OmicsSIMLA. The genomics data that can be simulated  
52  
53  
54 include SNPs and CNVs. Genotypes at SNPs in unrelated and/or family samples are  
55  
56  
57 simulated based on the SeqSIMLA2 algorithm [14]. CNV status (i.e., a deletion, normal, one  
58  
59  
60

1 duplication or two duplications) on a chromosome is simulated based on the user-specified  
2  
3  
4 chromosomal regions and CNV frequencies. Affection status of each sample is determined by  
5  
6  
7 a logistic penetrance function conditional on the causal SNPs and CNVs, and/or the  
8  
9  
10 interactions among the causal SNPs. The epigenomics data are the methylated and total read  
11  
12  
13 counts at CpGs based on bisulphite sequencing, simulated using the pWGBSSimla algorithm  
14  
15  
16 incorporating methylation profiles for 29 human cell and tissue types [11]. Allele-specific  
17  
18  
19 methylation (ASM), in which paternal and maternal alleles have different methylation rates,  
20  
21  
22 and differentially methylated region (DMR), where the same CpGs in the region have  
23  
24  
25 different methylation rates among different cell types, can also be simulated. Furthermore, the  
26  
27  
28 transcriptomics data (i.e., RNA-seq read counts) are simulated with a parametric model  
29  
30  
31 assuming a negative-binomial distribution. Finally, the mass-action kinetic action model [15]  
32  
33  
34 is used to simulate proteomics data at a certain time point incorporating the gene expression  
35  
36  
37 data. Some SNPs can be specified as meQTLs and eQTLs, and some CpGs can be specified  
38  
39  
40 as eQTM. Allele-specific expression (ASE), which alleles in a gene have different expression  
41  
42  
43 levels, caused by cis-eQTL can also be simulated. The differential methylation, gene  
44  
45  
46 expression, and protein expression levels between cases and controls are simulated  
47  
48  
49 conditional on the affection status.  
50  
51  
52  
53  
54  
55  
56  
57

58 Using OmicsSIMLA, we simulated a multi-omics dataset based on hypothetical pathways for  
59  
60  
61  
62  
63  
64  
65

1 breast cancer as described in Ritchie et al. [9] and illustrated in Figure 2. The data included a  
2  
3  
4 deletion with a protective effect in the CYP1A1 gene, 3 common SNPs with risk effects in  
5  
6  
7 the CYP1B1 gene, 5 rare SNPs in the COMT gene, which had interaction effects with a  
8  
9  
10 meQTL for the XRCC1 gene, and 5 rare SNPs in the GSTM1 gene, which also had  
11  
12  
13 interaction effects with an eQTL affecting the gene and protein expression of the XRCC3  
14  
15  
16 gene. Finally, 5 rare SNPs in the GSTT1 gene also had interaction effects with a SNP in a  
17  
18  
19 regulatory region. A total of 2,022 SNPs in the four genes (i.e., CYP1B1, COMT, GSTM1,  
20  
21  
22 and GSTT1) and a regulatory region consisting of the meQTL, eQTL, and the SNP  
23  
24  
25 interacting with GSTT1, 1 CNV in CYP1A1, 688 CpGs in XRCC1, and gene and protein  
26  
27  
28 expression levels for 100 genes (including the expression for XRCC3 and 99 other  
29  
30  
31 hypothetical genes in the pathways) were simulated. More details about the simulations can  
32  
33  
34  
35  
36 be found in the Methods section.

37  
38  
39  
40  
41  
42 We compared the performance of three multi-omics data analysis methods for disease  
43  
44  
45 prediction using the area under the curve (AUC) measures. The three methods included the  
46  
47  
48 random forest-based method (RFomics), a graph-based integration method (CANetwork) [5],  
49  
50  
51 and a model-based integration method (ATHENA) [4]. The RFomics combines the  
52  
53  
54 preprocessed multi-omics data in a single matrix for constructing the prediction model. As  
55  
56  
57 described in the Methods section, a gene-based risk score is calculated based on SNPs for  
58  
59  
60

1 each gene. Then the risk scores and other multi-omics data are normalized so that they can be  
2  
3  
4 evaluated on the same scale by the RF algorithm. In contrast, CANetwork calculates a graph  
5  
6  
7 matrix to measure the distance between samples using the composite association network  
8  
9  
10 algorithm [16], and the prediction model is created based on the distance matrix using the  
11  
12  
13 graph-based semi-supervised learning algorithm [17]. Finally, ATHENA creates a neural  
14  
15  
16 network model for each type of omics data and a final integrative model is generated based  
17  
18  
19 on these models.  
20  
21  
22  
23  
24  
25

26 Table 1 shows the area under the curve (AUC) for the three methods under three scenarios.  
27  
28  
29 Scenario 1 had 500 cases and 500 controls in the training set, and 100 cases and 100 controls  
30  
31  
32 in the validation set. Scenario 2 had the same sample sizes as those in Scenario 1, but the  
33  
34  
35 multi-omics data had less strong effects on the disease compared to Scenario 1. The effects of  
36  
37  
38 the multi-omics data were the same in Scenarios 3 as those in Scenario 1, but Scenarios 3 had  
39  
40  
41 larger sample size (i.e., 1,500 cases and 1,500 controls in the training data and 500 cases and  
42  
43  
44 500 controls in the validation data). More details of the three scenarios are provided in the  
45  
46  
47 Methods section. Prediction models for the three methods were created based on the training  
48  
49  
50 dataset, and their prediction accuracies were evaluated by the validation dataset. As seen in  
51  
52  
53  
54 Table 1, RFomics has the highest AUC in all 3 scenarios followed by ATHENA and  
55  
56  
57  
58 CANetwork. Table 2 shows the run time for the three methods. In Scenario 1, RFomics and  
59  
60  
61  
62  
63  
64  
65

1 CANetwork had similar performance, while ATHENA required more than 20-times the  
2  
3  
4 runtime of RFomics and CANetwork. In Scenario 3, CANetwork was the most efficient  
5  
6  
7 method followed by RFomics, and ATHENA also required significantly more time than the  
8  
9  
10 other two methods.  
11

## 12 **Discussion**

13  
14  
15  
16 We have developed OmicsSIMLA, which simulates multi-omics data (i.e., genomics,  
17  
18  
19  
20  
21  
22  
23  
24  
25  
26  
27  
28  
29  
30  
31  
32  
33  
34  
35  
36  
37  
38  
39  
40  
41  
42  
43  
44  
45  
46  
47  
48  
49  
50  
51  
52  
53  
54  
55  
56  
57  
58  
59  
60  
61  
62  
63  
64  
65  
66  
67  
68  
69  
70  
71  
72  
73  
74  
75  
76  
77  
78  
79  
80  
81  
82  
83  
84  
85  
86  
87  
88  
89  
90  
91  
92  
93  
94  
95  
96  
97  
98  
99  
100  
101  
102  
103  
104  
105  
106  
107  
108  
109  
110  
111  
112  
113  
114  
115  
116  
117  
118  
119  
120  
121  
122  
123  
124  
125  
126  
127  
128  
129  
130  
131  
132  
133  
134  
135  
136  
137  
138  
139  
140  
141  
142  
143  
144  
145  
146  
147  
148  
149  
150  
151  
152  
153  
154  
155  
156  
157  
158  
159  
160  
161  
162  
163  
164  
165  
166  
167  
168  
169  
170  
171  
172  
173  
174  
175  
176  
177  
178  
179  
180  
181  
182  
183  
184  
185  
186  
187  
188  
189  
190  
191  
192  
193  
194  
195  
196  
197  
198  
199  
200  
201  
202  
203  
204  
205  
206  
207  
208  
209  
210  
211  
212  
213  
214  
215  
216  
217  
218  
219  
220  
221  
222  
223  
224  
225  
226  
227  
228  
229  
230  
231  
232  
233  
234  
235  
236  
237  
238  
239  
240  
241  
242  
243  
244  
245  
246  
247  
248  
249  
250  
251  
252  
253  
254  
255  
256  
257  
258  
259  
260  
261  
262  
263  
264  
265  
266  
267  
268  
269  
270  
271  
272  
273  
274  
275  
276  
277  
278  
279  
280  
281  
282  
283  
284  
285  
286  
287  
288  
289  
290  
291  
292  
293  
294  
295  
296  
297  
298  
299  
300  
301  
302  
303  
304  
305  
306  
307  
308  
309  
310  
311  
312  
313  
314  
315  
316  
317  
318  
319  
320  
321  
322  
323  
324  
325  
326  
327  
328  
329  
330  
331  
332  
333  
334  
335  
336  
337  
338  
339  
340  
341  
342  
343  
344  
345  
346  
347  
348  
349  
350  
351  
352  
353  
354  
355  
356  
357  
358  
359  
360  
361  
362  
363  
364  
365  
366  
367  
368  
369  
370  
371  
372  
373  
374  
375  
376  
377  
378  
379  
380  
381  
382  
383  
384  
385  
386  
387  
388  
389  
390  
391  
392  
393  
394  
395  
396  
397  
398  
399  
400  
401  
402  
403  
404  
405  
406  
407  
408  
409  
410  
411  
412  
413  
414  
415  
416  
417  
418  
419  
420  
421  
422  
423  
424  
425  
426  
427  
428  
429  
430  
431  
432  
433  
434  
435  
436  
437  
438  
439  
440  
441  
442  
443  
444  
445  
446  
447  
448  
449  
450  
451  
452  
453  
454  
455  
456  
457  
458  
459  
460  
461  
462  
463  
464  
465  
466  
467  
468  
469  
470  
471  
472  
473  
474  
475  
476  
477  
478  
479  
480  
481  
482  
483  
484  
485  
486  
487  
488  
489  
490  
491  
492  
493  
494  
495  
496  
497  
498  
499  
500  
501  
502  
503  
504  
505  
506  
507  
508  
509  
510  
511  
512  
513  
514  
515  
516  
517  
518  
519  
520  
521  
522  
523  
524  
525  
526  
527  
528  
529  
530  
531  
532  
533  
534  
535  
536  
537  
538  
539  
540  
541  
542  
543  
544  
545  
546  
547  
548  
549  
550  
551  
552  
553  
554  
555  
556  
557  
558  
559  
560  
561  
562  
563  
564  
565  
566  
567  
568  
569  
570  
571  
572  
573  
574  
575  
576  
577  
578  
579  
580  
581  
582  
583  
584  
585  
586  
587  
588  
589  
590  
591  
592  
593  
594  
595  
596  
597  
598  
599  
600  
601  
602  
603  
604  
605  
606  
607  
608  
609  
610  
611  
612  
613  
614  
615  
616  
617  
618  
619  
620  
621  
622  
623  
624  
625  
626  
627  
628  
629  
630  
631  
632  
633  
634  
635  
636  
637  
638  
639  
640  
641  
642  
643  
644  
645  
646  
647  
648  
649  
650  
651  
652  
653  
654  
655  
656  
657  
658  
659  
660  
661  
662  
663  
664  
665  
666  
667  
668  
669  
670  
671  
672  
673  
674  
675  
676  
677  
678  
679  
680  
681  
682  
683  
684  
685  
686  
687  
688  
689  
690  
691  
692  
693  
694  
695  
696  
697  
698  
699  
700  
701  
702  
703  
704  
705  
706  
707  
708  
709  
710  
711  
712  
713  
714  
715  
716  
717  
718  
719  
720  
721  
722  
723  
724  
725  
726  
727  
728  
729  
730  
731  
732  
733  
734  
735  
736  
737  
738  
739  
740  
741  
742  
743  
744  
745  
746  
747  
748  
749  
750  
751  
752  
753  
754  
755  
756  
757  
758  
759  
760  
761  
762  
763  
764  
765  
766  
767  
768  
769  
770  
771  
772  
773  
774  
775  
776  
777  
778  
779  
780  
781  
782  
783  
784  
785  
786  
787  
788  
789  
790  
791  
792  
793  
794  
795  
796  
797  
798  
799  
800  
801  
802  
803  
804  
805  
806  
807  
808  
809  
810  
811  
812  
813  
814  
815  
816  
817  
818  
819  
820  
821  
822  
823  
824  
825  
826  
827  
828  
829  
830  
831  
832  
833  
834  
835  
836  
837  
838  
839  
840  
841  
842  
843  
844  
845  
846  
847  
848  
849  
850  
851  
852  
853  
854  
855  
856  
857  
858  
859  
860  
861  
862  
863  
864  
865  
866  
867  
868  
869  
870  
871  
872  
873  
874  
875  
876  
877  
878  
879  
880  
881  
882  
883  
884  
885  
886  
887  
888  
889  
890  
891  
892  
893  
894  
895  
896  
897  
898  
899  
900  
901  
902  
903  
904  
905  
906  
907  
908  
909  
910  
911  
912  
913  
914  
915  
916  
917  
918  
919  
920  
921  
922  
923  
924  
925  
926  
927  
928  
929  
930  
931  
932  
933  
934  
935  
936  
937  
938  
939  
940  
941  
942  
943  
944  
945  
946  
947  
948  
949  
950  
951  
952  
953  
954  
955  
956  
957  
958  
959  
960  
961  
962  
963  
964  
965  
966  
967  
968  
969  
970  
971  
972  
973  
974  
975  
976  
977  
978  
979  
980  
981  
982  
983  
984  
985  
986  
987  
988  
989  
990  
991  
992  
993  
994  
995  
996  
997  
998  
999  
1000

We used OmicsSIMLA to simulate a multi-omics dataset for breast cancer based on  
hypothetical pathways. Three analysis tools were compared using the dataset. The results

1 suggest that when the different types of data were properly normalized on the same scale, the  
2  
3  
4 RF-based method (i.e., RFomics) achieved the highest AUC. Furthermore, RFomics had  
5  
6  
7 comparable runtime efficiency as that of CANetwork, while ATHENA was computationally  
8  
9  
10 expensive. Therefore, RFomics can potentially be a useful analysis tool for disease prediction  
11  
12  
13 using multi-omics data.  
14  
15  
16  
17  
18  
19

20 Currently, OmicsSIMLA focuses on simulating the dichotomous trait (i.e., affection status).  
21  
22

23 As studies for quantitative traits are also important, it is our future work to extend  
24  
25

26 OmicsSIMLA to simulate quantitative traits based on the classic quantitative genetics model  
27  
28

29 [18]. Furthermore, environmental factors and the interactions between genes and  
30  
31

32 environments can also play important roles in complex disease etiology. Therefore,  
33  
34

35 simulating exposome data such as the climate and air quality data and modeling their  
36  
37

38 interactions with genes are also important in the future extensions of OmicsSIMLA.  
39  
40  
41  
42  
43  
44

## 45 **Conclusions**

46  
47

48 In conclusion, we developed a useful multi-omics data simulator, OmicsSIMLA, for complex  
49  
50

51 disease studies. Benchmark datasets can be simulated by OmicsSIMLA for evaluating  
52  
53

54 different multi-omics data analysis methods for disease studies. OmicsSIMLA can also be  
55  
56

57 used to estimate sample sizes and statistical power when designing a new multi-omics disease  
58  
59  
60  
61  
62  
63  
64  
65

1 study. As many parameters can be adjusted in OmicsSIMLA, a user-friendly web interface is  
2  
3  
4 provided at <https://omicssimla.sourceforge.io/generateCommand.html> to conveniently specify  
5  
6  
7 these parameters.  
8  
9

## 10 11 12 **Methods**

### 13 14 **Simulation of DNA sequences**

15  
16  
17 The SeqSIMLA2 package [14] is integrated in OmicsSIMLA to generate DNA sequences in  
18  
19  
20 unrelated/related individuals. Similar to SeqSIMLA2, OmicsSIMLA expects a set of external  
21  
22  
23 reference sequences (i.e., haplotypes) generated by an external sequence generator, such as  
24  
25  
26 COSI [19] or HAPGEN2 [20] that has been widely adopted in genetics studies. Generally, a  
27  
28  
29 set of 10,000 or more reference sequences are expected. Optional files consisting of  
30  
31  
32 recombination rate information and pedigree structures are also accepted. A gene dropping  
33  
34  
35 algorithm assuming random mating with crossovers is performed based on the reference  
36  
37  
38 sequences, recombination rates, and pedigree structures to generate haplotypes in each  
39  
40  
41 individual.  
42  
43  
44  
45  
46

### 47 48 **Simulation of CNVs**

49  
50  
51 For the simulation of CNVs, we considered four CNV states including deletion (D),  
52  
53  
54 normal (N), one duplication (U), and two duplications (UU) on a chromosome.  
55  
56  
57 Therefore, there are 10 types of CNV states on the two chromosomes in an individual, as  
58  
59  
60

1 shown in Supplementary Table S1, and the total copy numbers on the two chromosomes  
 2  
 3  
 4 range from 0 to 6. The user will provide frequencies and ranges of the four CNV states.  
 5

6  
 7 During meiosis, we use the single-copy crossover model, assuming all crossovers  
 8  
 9  
 10 occurred between CNVs [21].  
 11

### 12 **Simulation of affection status**

13  
 14 Genetic variants, including SNPs and CNVs, are used to determine the affection status of an  
 15  
 16  
 17 individual based on a logistic penetrance function as follows:  
 18  
 19  
 20

$$21 \text{logit}(P(\textit{affected})) = \beta_0 + \sum_{i \in \Omega} \beta_{C_{i1}} C_{i1} + \sum_{i \in \Omega} \beta_{C_{i2}} C_{i2} + \sum_{j \in \Psi} \beta_{G_j} G_j + \sum_{m,n \in \Upsilon} \beta_{mn} G_{mn}$$

22  
 23 where  $P(\textit{affected})$  is the probability of being affected,  $\beta_0$  determines the baseline  
 24  
 25  
 26 prevalence,  $\Omega$ ,  $\Psi$ , and  $\Upsilon$  are sets of causal CNVs, SNPs with main effects, and SNPs  
 27  
 28  
 29 with interaction effects, respectively, specified by the user,  $C_{i1}$  and  $C_{i2}$  are the CNV states for  
 30  
 31  
 32 the first and second haplotypes at CNV  $i$ , respectively,  $G_j$  is the genotype coding at SNP  $j$ ,  
 33  
 34  
 35 and  $G_{mn}$  is the genotype coding at SNPs  $m$  and  $n$ .  $C_{i1}$  and  $C_{i2}$  have values of -1, 0, 1, and 2 for  
 36  
 37  
 38 CNV states  $D$ ,  $N$ ,  $U$ , and  $UU$ , respectively, where  $N$  is the baseline state. The coding of  $G_j$  is  
 39  
 40  
 41 based on a dominant, additive or recessive model, and the coding of  $G_{mn}$  is based on several  
 42  
 43  
 44 interaction models. If SNP  $j$  is in a CNV region, allelic CNV [22] is considered in the coding  
 45  
 46  
 47 of  $G_j$ . More details of the coding of  $G_j$  and  $G_{mn}$  are provided in Supplementary methods. The  
 48  
 49  
 50 parameters  $\beta_C$  and  $\beta_G$  are the effect sizes of the main effects for CNVs and SNPs,  
 51  
 52  
 53 respectively, and  $\beta_{mn}$  determines the effect size of the interaction effect between SNPs  $m$   
 54  
 55  
 56  
 57  
 58  
 59  
 60  
 61  
 62  
 63  
 64  
 65



1 and  $n$ . These parameters are specified by the user.  
2  
3

#### 4 **Simulation of DNA methylation data** 5

6  
7 The pWGBSSimla package [11] is integrated into OmicsSIMLA to generate the WGBS data.  
8

9  
10 The pWGBSSimla algorithm simulates data using methylation profiles generated based on 41  
11

12 WGBS datasets for 29 human cell and tissue types. The profiles contain the information for  
13

14 each CpG, such as its distance to the next site, methylation rate, methylation status (i.e.,  
15

16 methylated, unmethylated, and fuzzily methylated), and read counts for each type of  
17  
18

19 methylation status. CpGs and the distances between the CpGs are first determined based on  
20  
21

22 the profiles, and then the total read count and methylated read count are simulated for each  
23  
24

25 CpG. Methylation level at a CpG influenced by a meQTL is simulated based on a genotype-  
26  
27

28 specific methylation probability, which is the methylation rate of the CpG in the profiles  
29  
30

31 multiplied by a ratio following an exponential distribution. Furthermore, ASMs are simulated  
32  
33

34 based on father- and mother-specific methylation rates for paternal and maternal alleles,  
35  
36

37 respectively. Finally, a DMR is generated by simulating the same genomic region using  
38  
39

40 profiles for different cell or tissue types. More details of the pWGBSSimla algorithm can be  
41  
42

43 found in Chung and Kang [11].  
44  
45

#### 46 **Simulation of RNA-seq data** 47

48 We implemented a parametric simulation procedure for simulating the RNA-seq data  
49  
50

51 similar to that described in Benidt and Nettleton [13]. A negative binomial (NB)  
52  
53  
54  
55  
56  
57  
58  
59  
60  
61  
62  
63  
64  
65

1 distribution with mean  $\mu_{ij}$  and dispersion parameter  $\omega_i$  is used to simulate the read  
 2  
 3  
 4 count for gene  $i$  in individual  $j$ . The mean is calculated as  $\mu_{ij} = \lambda_i c_j$ , where  $\lambda_i$  is the  
 5  
 6  
 7 common mean for gene  $i$  and  $c_j$  is the individual-specific normalization factor for  
 8  
 9  
 10 individual  $j$ . The parameters  $\lambda$ ,  $c$ , and  $\omega$  for all genes were estimated using the R  
 11  
 12  
 13 package edgeR [23] based on a whole genome RNA-seq dataset consisting of 103 normal  
 14  
 15  
 16 tissues in patients with breast cancer from The Cancer Genome Atlas (TCGA) project  
 17  
 18  
 19 [24]. The parameters  $\lambda_i$  and  $\omega_i$  are randomly sampled with replacement from  $\lambda$  and  
 20  
 21  
 22  $\omega$ . If more than 103 samples are simulated, we use the smoothed bootstrap procedure  
 23  
 24  
 25 [25] to calculate  $c_j^*$  for individual  $j$ , and  $\mu_{ij}$  is calculated as  $\lambda_i c_j^*$ . More details of the  
 26  
 27  
 28 calculation of  $c_j^*$  are provided in Supplementary methods. The user can specify  $n$   
 29  
 30  
 31 differentially expressed (DE) genes between cases and controls and their fold changes,  
 32  
 33  
 34 and the read count for DE gene  $i$  in individual  $j$  is simulated based on a NB distribution  
 35  
 36  
 37 with mean  $f_i \mu_{ij}$  and dispersion parameter  $\omega_i$ , where  $f_i$  is the fold change for gene  $i$ .  
 38  
 39  
 40  
 41

#### 42 Simulation of eQTL and allele-specific reads

43  
 44  
 45 We followed the procedure in the simulation study in Sun [26] to simulate eQTL and read  
 46  
 47  
 48 counts for ASE. For eQTL  $l$  with a user-specified fold change  $h_l$ , the means for the three  
 49  
 50  
 51 genotypes  $AA$ ,  $Aa$ , and  $aa$  at the eQTL are  $\mu_{ij}$ ,  $h_l \mu_{ij}$ , and  $(2h_l - 1)\mu_{ij}$ , respectively, and the  
 52  
 53  
 54 dispersion parameter is  $\omega_i$  in the NB distribution for gene  $i$  influenced by the eQTL. ASE  
 55  
 56  
 57 for a gene caused by a cis-eQTL is simulated by assuming reads were mapped to  
 58  
 59  
 60

heterozygous SNPs (i.e., allele-specific reads) in the gene. A cis-eQTL refers to the eQTL being located in the cis-regulatory elements of the gene. Because the alleles at the cis-eQTL can be in the same haplotype as the alleles of the gene, ASE can be observed using the allele-specific reads of the gene. Furthermore, only heterozygous SNPs can be tested for cis-eQTL with the allele-specific reads. Therefore, we simulate allele-specific reads for heterozygous eQTLs. Assuming  $t_{ij}$  is the total read count for gene  $i$  in individual  $j$ , the total number of allele-specific reads is calculated as  $0.005t_{ij}$ , where 0.005 was estimated from real data by Sun [26]. Furthermore, also suggested by Sun [26], the number of allele-specific reads for a haplotype is simulated using a beta-binomial distribution with a mean determined by the effect size of the cis-eQTL and an overdispersion parameter of 0.1. The effect size is defined as  $\log_2(\text{expression of the alternative allele at the eQTL}/\text{expression of the reference allele at the eQTL})$  [27] for a heterozygous cis-eQTL and is set to 0 for a homozygous cis-eQTL.

### Simulation of eQTM

We used linear regression to model the relationship between gene expression and methylation:

$\mu_i = E(y_{ij}) = \alpha_i + \beta_i x_{ij}$ , where  $y_{ij}$  and  $x_{ij}$  are the RNA-seq read count and the proportion of methylated reads, respectively, for gene  $i$  influenced by methylation in individual  $j$ . Assuming that the NB parameters for gene  $i$  are  $\mu_i$  and  $\phi_i$ , the parameter  $\alpha_i$  is specified as  $\mu_i$ , and  $\beta_i$  is assumed to follow a normal distribution with a mean and a standard deviation specified

1 by the user. Then the gene expression of gene  $i$  is simulated by an NB distribution with  
2  
3  
4 parameters of  $\mu_i$  and  $\phi_i$ .  
5  
6

### 7 **Protein expression simulation**

8  
9

10 We assumed that the protein expression level for protein  $k$  at a time point  $t$  in sample  $j$   
11  
12 follows a normal distribution with a mean  $\eta_{kjt}$  and a standard deviation  $\tau_k$  after  
13  
14 normalization. We used the mass-action kinetic action model [15] to simulate protein  
15  
16 expression at a certain time point. The mean  $\eta_{k,j,t+1}$  for the protein expression at time  $t+1$   
17  
18 was determined as follows:  
19  
20  
21  
22  
23  
24

$$25 \eta_{k,j,t+1} = \eta_{kjt} + (x_{kjt} \kappa_{jt}^s - \eta_{kjt} \kappa_{jt}^d),$$

26  
27  
28

29 where  $x_{kjt}$  is the normalized gene expression for the gene encoding protein  $k$ , and  $\kappa_{jt}^s$  and  
30  
31  $\kappa_{jt}^d$  are the protein synthesis and degradation rates, respectively, in individual  $j$  at time  $t$ . The  
32  
33 normalized gene expression  $x_{kjt}$  is calculated using the median absolute deviation (MAD)  
34  
35 scale normalization [28] based on the RNA-seq data simulated from the previous section.  
36  
37  
38  
39

40 Similar to the simulation study in Teo et al. [15],  $\kappa_{jt}^d$  is fixed to be 1, and  $\kappa_{jt}^s$  with a default  
41  
42 value of 1 can be changed by the user. A vector of standard deviations  $\tau$  were estimated  
43  
44  
45 from the level 4 protein expression data of primary tumor tissue in 874 breast cancer patients  
46  
47  
48 from the TCGA project downloaded from the cancer proteome atlas (TCPA) [29] website.  
49  
50  
51

52 The level 4 data consist of protein expression data for 224 proteins that have been normalized  
53  
54  
55 across the samples as well as across the proteins, and a replication-based method was used to  
56  
57  
58  
59  
60

1 account for differences in protein expression among different batches. The parameter  $\tau_j$  is  
2  
3  
4 then randomly sampled with replacement from  $\tau$ .  
5  
6

## 7 **A random-forest based method for integrating multi-omics data for disease studies**

8  
9

10 Multi-omics data can have different data types (e.g., discrete data for SNP genotypes,  
11  
12 categorical data for CNV statuses, and continuous data for proportions of methylated reads,  
13  
14 RNA-seq read counts, and normalized protein expression) and different variations (e.g., three  
15  
16 possible values of 0, 1, and 2 for minor allele counts at SNPs, and real numbers ranging  
17  
18 between 0 and 1 for the proportions of methylated reads). When developing a method for  
19  
20 integrating these data, it is important to account for the properties of different data types so  
21  
22 that the analysis results would not be biased toward certain variables [9]. We developed a  
23  
24 preprocessing algorithm for the multi-omics data. A gene-based risk score, which is a  
25  
26 weighted sum of the numbers of risk alleles at SNPs in the gene, for each individual is  
27  
28 constructed. The weights are the effect sizes of the risk alleles at the SNPs. More details for  
29  
30 calculating the risk score are provided in Supplementary methods. Then each variable from  
31  
32 different omics data, including the gene-based risk scores, CNV statuses of genes,  
33  
34 methylation proportions at CpGs, gene and protein expression levels, is normalized so that it  
35  
36 has a mean 0 and a standard deviation of 1. The normalized variables are then used in RF for  
37  
38 classification.  
39  
40  
41  
42  
43  
44  
45  
46  
47  
48  
49  
50  
51  
52  
53  
54  
55  
56

## 57 **Simulation studies**

58  
59  
60  
61  
62  
63  
64  
65

1 We used OmicsSIMLA to evaluate the performance of the proposed RF-based method,  
2  
3  
4 compared with CANetwork and ATHENA. A hypothetical disease model for breast cancer  
5  
6  
7 involving multi-omics data [9] was simulated, as shown in Figure 2. To be more specific, a  
8  
9  
10 deletion with a frequency of 20%, which had a protective effect with an odds ratio (OR) of  
11  
12  
13 0.67, in the CYP1A1 gene and 3 common variants, which had main effects (ORs = 1.5) with  
14  
15  
16 minor allele frequencies (MAFs) > 10%, in the CYP1B1 gene were simulated. We also  
17  
18  
19 simulated 5 rare variants with MAFs < 3% in the COMT gene, which had interaction effects  
20  
21  
22 (ORs = 5) with a meQTL for the XRCC1 gene. The CpG in XRCC1 influenced by the  
23  
24  
25 meQTL caused a difference in methylation rates of 10% between cases and controls.  
26  
27  
28  
29 Furthermore, we simulated 5 rare variants in the GSTM1 gene, which had interaction effects  
30  
31  
32 (ORs = 5) with a cis-eQTL for the XRCC3 gene, and 5 rare variants in the GSTT1 gene,  
33  
34  
35 which had interaction effects (ORs = 5) with a SNP located in the same region as that of the  
36  
37  
38 meQTL and eQTL. The eQTL caused a fold change of 1.5 in the XRCC3 gene expression  
39  
40  
41 compared to the reference genotype, and a fold change of 1.5 was simulated for the  
42  
43  
44 differential gene expression of XRCC3 between cases and controls. In summary, the total  
45  
46  
47 variables consisted of 200, 687, 264, and 176 SNPs in the CYP1B1, COMT, GSTM1, and  
48  
49  
50 GSTT1 genes, respectively, and 695 SNPs harboring the meQTL, eQTL, and the SNP  
51  
52  
53 interacting with GSTT1 in the regulatory region, a variable for CNV status in CYP1A1,  
54  
55  
56  
57 methylation levels at 688 CpGs in XRCC1, and gene and protein expression levels for 100  
58  
59  
60

1 genes and their encoded proteins. More details for generating the reference sequences in the  
2  
3  
4 genes and the simulations for each omics data type are provided in Supplementary methods.  
5  
6  
7

8  
9  
10 We simulated a training dataset consisting of 500 cases and 500 controls as well as a  
11  
12 validation dataset consisting of 100 cases and 100 controls. The training dataset was used by  
13  
14 RFomics, CANetwork, or ATHENA to construct a prediction model. The validation dataset  
15  
16 was then used to calculate the AUC based on the prediction model. Note that a 5-fold cross-  
17  
18 validation was performed in ATHENA, and a best model based on the testing dataset (i.e.,  
19  
20 one of the five random 20% of the training dataset) was created for each cross-validation. The  
21  
22 model with the highest AUC based on the testing dataset was selected and applied to the  
23  
24 validation dataset. This simulation scenario was referred to as Scenario 1. We also simulated  
25  
26 a scenario with less strong genetic effects (Scenario 2) and a scenario with larger sample size  
27  
28 (Scenario 3). More details about Scenarios 2 and 3 are provided in Supplementary methods.  
29  
30 For each scenario, 1,000 batches of training and validation datasets were simulated, and the  
31  
32 AUC for each algorithm was averaged over the 1,000 batches.  
33  
34  
35  
36  
37  
38  
39  
40  
41  
42  
43  
44  
45  
46  
47  
48  
49  
50

## 51 **Availability of supporting source code and requirements**

52 Project name: OmicsSIMLA  
53  
54

55 Project home page: <https://omicssimla.sourceforge.io>  
56  
57  
58  
59  
60

1 Operating system: Linux  
2

3  
4 Programming language: C++  
5

6  
7 Other requirements: C++11 compiler and Eigen and boost libraries if directly compiling the  
8  
9  
10 source code.  
11

12  
13 License: GPL-3.0  
14  
15  
16  
17  
18  
19

## 20 **Availability of supporting data**

21

22  
23 The simulated datasets supporting the conclusions of this article are available from the  
24  
25  
26 OmicsSIMLA website (<https://omicssimla.sourceforge.io/download.html>).  
27  
28  
29  
30  
31

## 32 **Declarations**

33

### 34 **Funding**

35

36  
37  
38  
39 This work has been supported by a grant from the Ministry of Science and Technology  
40  
41  
42 (MOST 106-2221-E-400-005-MY3) in Taiwan.  
43  
44

### 45 **Authors' contributions**

46

47  
48 RHC and CYK both designed the framework of the simulation tool and implemented the  
49  
50  
51 software. RHC designed the simulation study and CYK performed the simulation analysis.  
52  
53

54  
55 Both authors read and approved the final manuscript.  
56

### 57 **Competing interests**

58  
59  
60  
61  
62  
63  
64  
65



The authors declare that they have no competing interests.

1  
2  
3  
4  
5  
6  
7  
8  
9  
10  
11  
12  
13  
14  
15  
16  
17  
18  
19  
20  
21  
22  
23  
24  
25  
26  
27  
28  
29  
30  
31  
32  
33  
34  
35  
36  
37  
38  
39  
40  
41  
42  
43  
44  
45  
46  
47  
48  
49  
50  
51  
52  
53  
54  
55  
56  
57  
58  
59  
60  
61  
62  
63  
64  
65

## References

1. Timpson NJ, Greenwood CMT, Soranzo N, Lawson DJ and Richards JB. Genetic architecture: the shape of the genetic contribution to human traits and disease. *Nature reviews Genetics*. 2018;19 2:110-24. doi:10.1038/nrg.2017.101.
2. Karczewski KJ and Snyder MP. Integrative omics for health and disease. *Nature reviews Genetics*. 2018;19 5:299-310. doi:10.1038/nrg.2018.4.
3. Hasin Y, Seldin M and Luskis A. Multi-omics approaches to disease. *Genome biology*. 2017;18 1:83. doi:10.1186/s13059-017-1215-1.
4. Holzinger ER, Dudek SM, Frase AT, Pendergrass SA and Ritchie MD. ATHENA: the analysis tool for heritable and environmental network associations. *Bioinformatics*. 2014;30 5:698-705. doi:10.1093/bioinformatics/btt572.
5. Yan KK, Zhao H and Pang H. A comparison of graph- and kernel-based -omics data integration algorithms for classifying complex traits. *BMC bioinformatics*. 2017;18 1:539. doi:10.1186/s12859-017-1982-4.
6. Ruffalo M, Koyuturk M and Sharan R. Network-Based Integration of Disparate Omic Data To Identify "Silent Players" in Cancer. *PLoS computational biology*. 2015;11 12:e1004595. doi:10.1371/journal.pcbi.1004595.
7. Jennings EM, Morris JS, Carroll RJ, Manyam GC and Baladandayuthapani V. Bayesian methods for expression-based integration of various types of genomics data. *EURASIP J Bioinform Syst Biol*. 2013;2013 1:13. doi:10.1186/1687-4153-2013-13.
8. Tyekuceva S, Marchionni L, Karchin R and Parmigiani G. Integrating diverse genomic data using gene sets. *Genome biology*. 2011;12 10:R105. doi:10.1186/gb-2011-12-10-r105.
9. Ritchie MD, Holzinger ER, Li R, Pendergrass SA and Kim D. Methods of integrating data to uncover genotype-phenotype interactions. *Nature reviews Genetics*. 2015;16 2:85-97. doi:10.1038/nrg3868.
10. Rackham OJ, Dellaportas P, Petretto E and Bottolo L. WGBSSuite: simulating whole-genome bisulphite sequencing data and benchmarking differential DNA methylation analysis tools. *Bioinformatics*. 2015;31 14:2371-3. doi:10.1093/bioinformatics/btv114.
11. Chung R-H and Kang C-Y. pWGBSSimla: a profile-based whole-genome bisulphite sequencing data simulator incorporating methylation QTLs, allele-specific methylations and differentially methylated regions. *bioRxiv*. 2018; doi:10.1101/390633.
12. Frazee AC, Jaffe AE, Langmead B and Leek JT. Polyester: simulating RNA-seq datasets with differential transcript expression. *Bioinformatics*. 2015;31 17:2778-84. doi:10.1093/bioinformatics/btv272.
13. Benidt S and Nettleton D. SimSeq: a nonparametric approach to simulation of RNA-

- 1  
2  
3  
4  
5  
6  
7  
8  
9  
10  
11  
12  
13  
14  
15  
16  
17  
18  
19  
20  
21  
22  
23  
24  
25  
26  
27  
28  
29  
30  
31  
32  
33  
34  
35  
36  
37  
38  
39  
40  
41  
42  
43  
44  
45  
46  
47  
48  
49  
50  
51  
52  
53  
54  
55  
56  
57  
58  
59  
60  
61  
62  
63  
64  
65
- sequence datasets. *Bioinformatics*. 2015;31 13:2131-40.  
doi:10.1093/bioinformatics/btv124.
14. Chung RH, Tsai WY, Hsieh CH, Hung KY, Hsiung CA and Hauser ER. SeqSIMLA2: simulating correlated quantitative traits accounting for shared environmental effects in user-specified pedigree structure. *Genetic epidemiology*. 2015;39 1:20-4.  
doi:10.1002/gepi.21850.
15. Teo G, Vogel C, Ghosh D, Kim S and Choi H. *A Mass-Action-Based Model for Gene Expression Regulation in Dynamic Systems*. Cambridge University Press; 2015.
16. Mostafavi S, Ray D, Warde-Farley D, Grouios C and Morris Q. GeneMANIA: a real-time multiple association network integration algorithm for predicting gene function. *Genome biology*. 2008;9 Suppl 1:S4. doi:10.1186/gb-2008-9-s1-s4.
17. Tsuda K, Shin H and Scholkopf B. Fast protein classification with multiple networks. *Bioinformatics*. 2005;21 Suppl 2:ii59-65. doi:10.1093/bioinformatics/bti1110.
18. Falconer DS and Mackay TF. *Quantitative genetics*. San Francisco: Benjamin Cummings; 1996.
19. Schaffner SF, Foo C, Gabriel S, Reich D, Daly MJ and Altshuler D. Calibrating a coalescent simulation of human genome sequence variation. *Genome research*. 2005;15 11:1576-83. doi:10.1101/gr.3709305.
20. Su Z, Marchini J and Donnelly P. HAPGEN2: simulation of multiple disease SNPs. *Bioinformatics*. 2011;27 16:2304-5. doi:10.1093/bioinformatics/btr341.
21. Hartasanchez DA, Valles-Codina O, Braso-Vives M and Navarro A. Interplay of interlocus gene conversion and crossover in segmental duplications under a neutral scenario. *G3*. 2014;4 8:1479-89. doi:10.1534/g3.114.012435.
22. Usher CL and McCarroll SA. Complex and multi-allelic copy number variation in human disease. *Briefings in functional genomics*. 2015;14 5:329-38.  
doi:10.1093/bfgp/elv028.
23. Robinson MD, McCarthy DJ and Smyth GK. edgeR: a Bioconductor package for differential expression analysis of digital gene expression data. *Bioinformatics*. 2010;26 1:139-40. doi:10.1093/bioinformatics/btp616.
24. Cancer Genome Atlas Research N. Comprehensive genomic characterization defines human glioblastoma genes and core pathways. *Nature*. 2008;455 7216:1061-8.  
doi:10.1038/nature07385.
25. Efron B and Tibshirani RJ. *An Introduction to the Bootstrap*. Chapman and Hall/CRC; 1993.
26. Sun W. A statistical framework for eQTL mapping using RNA-seq data. *Biometrics*. 2012;68 1:1-11. doi:10.1111/j.1541-0420.2011.01654.x.
27. Mohammadi P, Castel SE, Brown AA and Lappalainen T. Quantifying the regulatory effect size of cis-acting genetic variation using allelic fold change. *Genome research*.

2017;27 11:1872-84. doi:10.1101/gr.216747.116.

28. Fundel K, Kuffner R, Aigner T and Zimmer R. Normalization and gene p-value estimation: issues in microarray data processing. *Bioinform Biol Insights*. 2008;2:291-305.
29. Li J, Lu Y, Akbani R, Ju Z, Roebuck PL, Liu W, et al. TCPA: a resource for cancer functional proteomics data. *Nature methods*. 2013;10 11:1046-7. doi:10.1038/nmeth.2650.

## Figures

1  
2  
3  
4  
5  
6  
7  
8  
9  
10  
11  
12  
13  
14  
15  
16  
17  
18  
19  
20  
21  
22  
23  
24  
25  
26  
27  
28  
29  
30  
31  
32  
33  
34  
35  
36  
37  
38  
39  
40  
41  
42  
43  
44  
45  
46  
47  
48  
49  
50  
51  
52  
53  
54  
55  
56  
57  
58  
59  
60  
61  
62  
63  
64  
65

Figure 1. Simulation framework of OmicsSIMLA. The black solid lines represent the relationships among different types of omics data. The black dotted lines represent the causal effects of genomics data to the disease. The red dotted lines represent the retrospective simulations of the methylation, gene expression and protein expression levels conditional on the disease status.

Figure 2. Hypothetical pathways involved in breast cancer. The brown solid lines represent the main effects of SNPs and CNVs on the disease, while the green solid lines represent the interaction effects of SNPs on the disease. The black solid lines represent the regulatory effects of the meQTL and eQTL on methylation and gene expression, respectively. The red dotted lines represent the retrospective simulations of the methylation, gene expression and protein expression levels conditional on the disease status.

## Tables

Table 1. Area under the curve (AUC) for RFomics, CANetwork, and ATHENA under different scenarios

|            | RFomics                    | CANetwork     | ATHENA        |
|------------|----------------------------|---------------|---------------|
| Scenario 1 | 0.861 (0.026) <sup>1</sup> | 0.596 (0.042) | 0.831 (0.042) |
| Scenario 2 | 0.566 (0.041)              | 0.529 (0.029) | 0.559 (0.068) |
| Scenario 3 | 0.876 (0.012)              | 0.649 (0.019) | 0.835 (0.031) |

<sup>1</sup>The mean AUC and its standard error estimated based on 1,000 batches

Table 2. Run time (in seconds) for RFomics, CANetwork, and ATHENA under Scenarios 1 and 3

|            | RFomics | CANetwork | ATHENA  |
|------------|---------|-----------|---------|
| Scenario 1 | 37.78   | 40.54     | 823.14  |
| Scenario 3 | 143.91  | 94.16     | 2195.95 |

<sup>1</sup>The mean time (in seconds) was estimated based on 100 batches

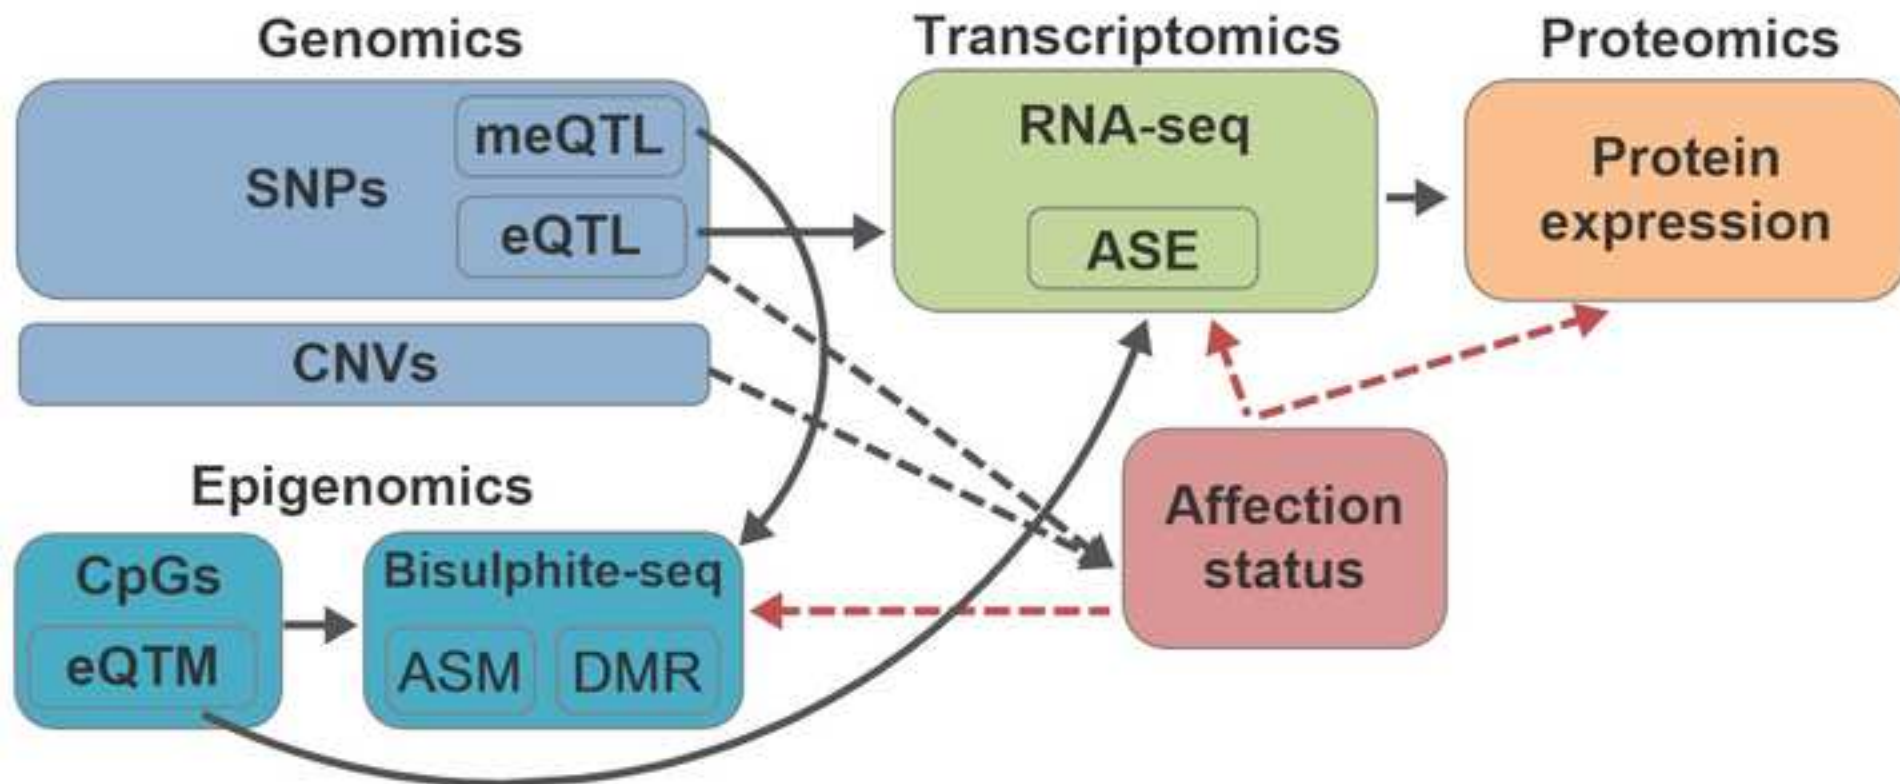

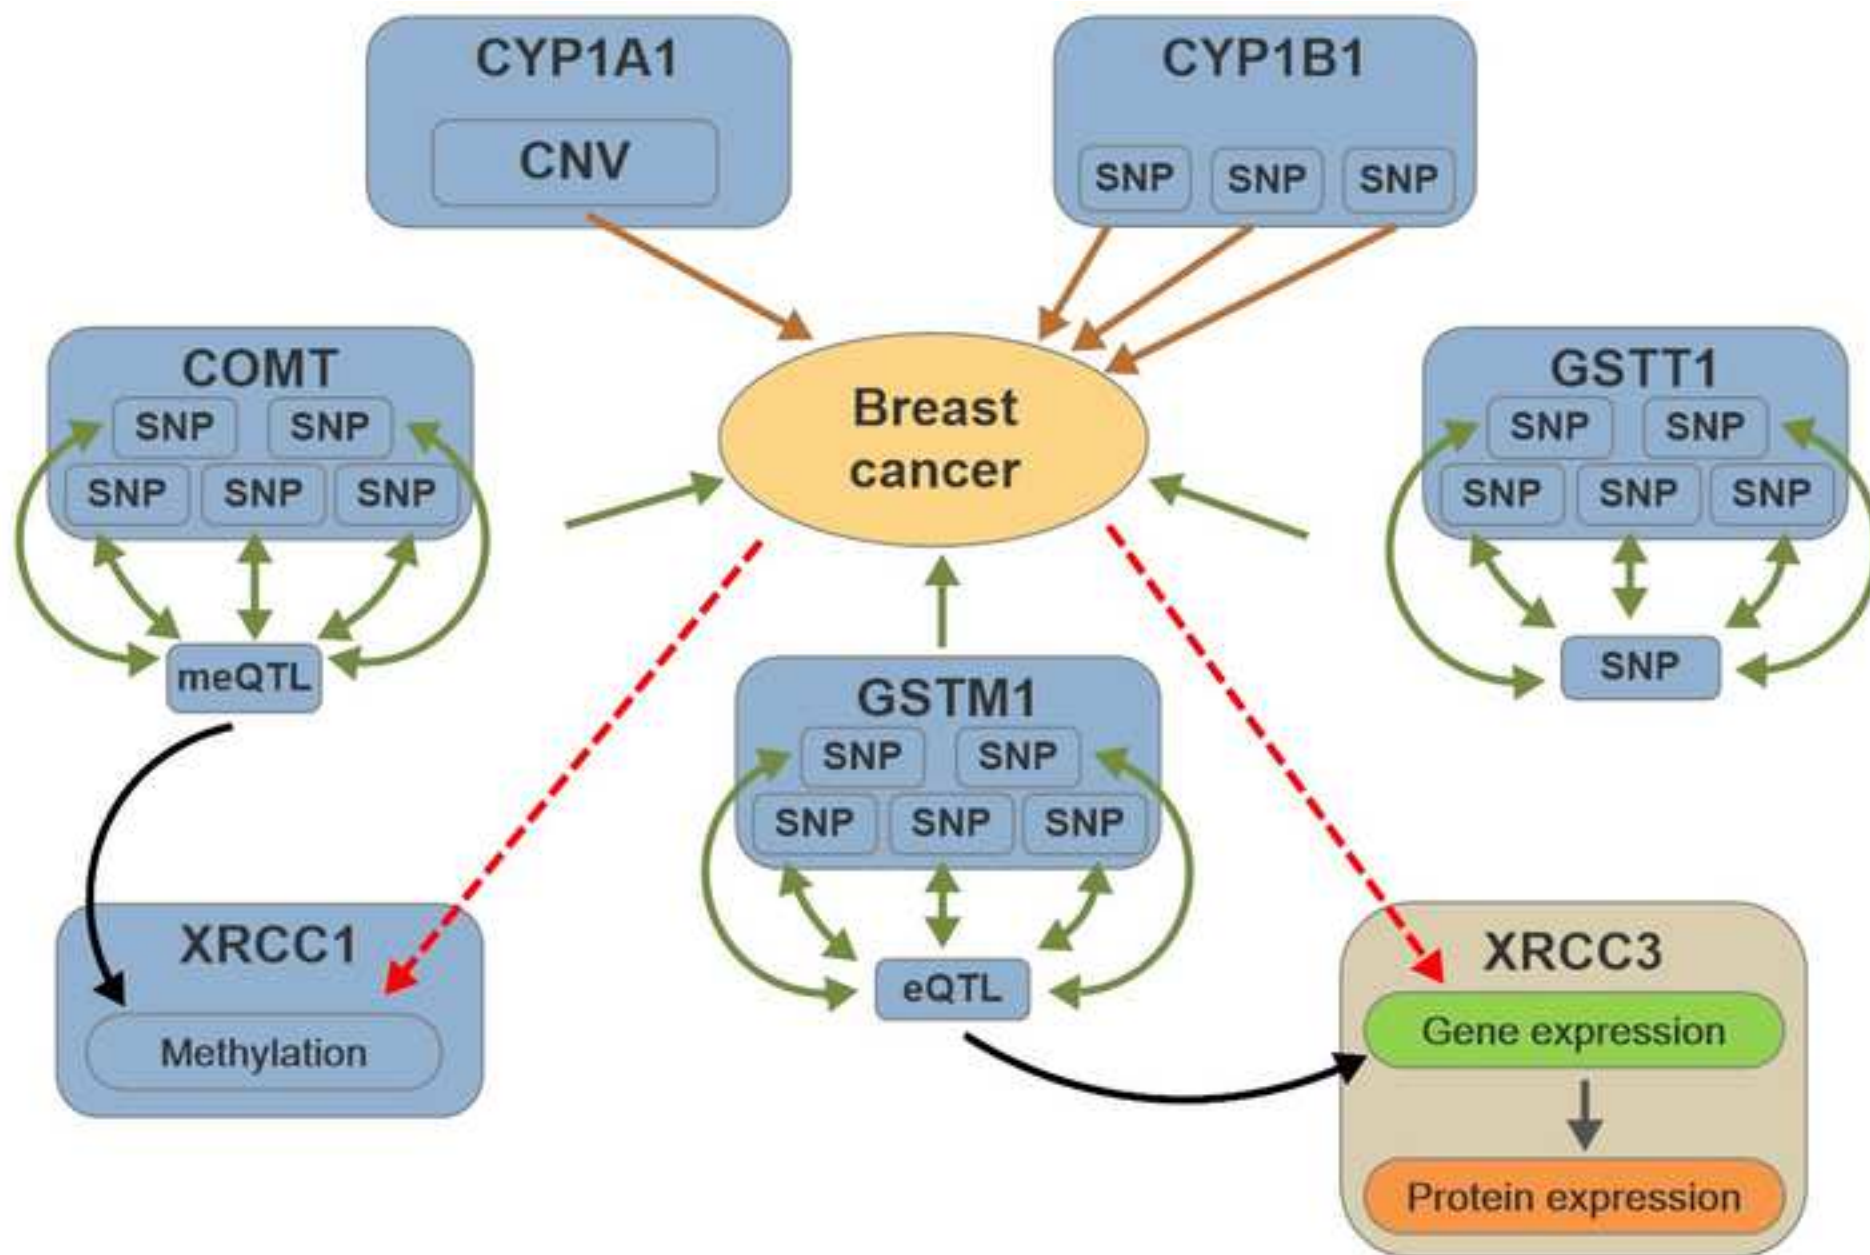



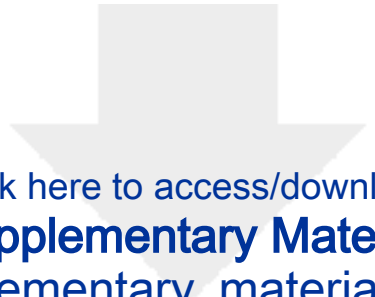

Click here to access/download  
**Supplementary Material**  
Supplementary\_material.docx

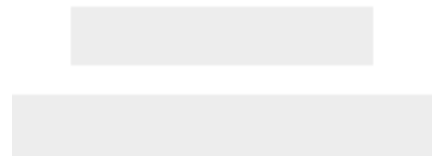

Supplement: giz045_giga-d-18-00397_original_submission.pdf [file giz045_giga-d-18-00397_original_submission.pdf]
